# Supplementary material for: The kinetics and mechanism of oxidation of reduced phosphovanadomolybdates by molecular oxygen: theory and experiment in concert
Source: Royal Society of Chemistry journal article supplement (doi:10.1039/c7cp08610e), 2018-01-01
Supplement: c7cp08610e1.pdf [file c7cp08610e1.pdf]

## Electronic Supplementary Information

### The Kinetics and Mechanism of Oxidation of Reduced Phosphovanadomolybdates by Molecular Oxygen: Theory and Experiment in Concert

Alexander M. Khenkin, Irena Efremenko, Jan M. L. Martin, and Ronny Neumann\*

Department of Organic Chemistry, Weizmann Institute of Science, Rehovot, Israel 76100

**Table S1.** The volumetric determination of dioxygen consumption for **1<sub>red1e</sub>**, and **1<sub>red2e</sub>**.

| Polyoxometalate          | [O <sub>2</sub> ], μmol |
|--------------------------|-------------------------|
| <b>1<sub>red2e</sub></b> | 50±5                    |
| <b>1<sub>red1e</sub></b> | 25±2                    |

Conditions: [**1<sub>red</sub>**] = 100 μmol in 2 mL of acetonitrile under air, T = 25 °C. Reactions were carried out in a magnetically stirred 10 mL volumetric flask kept at 25° ±0.2 °C with an oil bath (room temperature was 24-25 °C) connected to a gas burette for measuring the volume of consumed oxygen. The combined head space above the reaction solution was ~10 mL. The experimental error was ~ 10%.

**Table S2.** Outer-sphere reactions of O<sub>2</sub> and its reduced species with H<sub>6</sub>PV<sub>2</sub>Mo<sub>10</sub>O<sub>40</sub> and with H<sub>7</sub>PV<sub>2</sub>Mo<sub>10</sub>O<sub>40</sub> in gas phase and in acetonitrile at 298 K

|                                                                 | Gas phase      |                 |                               |                 | Acetonitrile   |                 |                               |                 |
|-----------------------------------------------------------------|----------------|-----------------|-------------------------------|-----------------|----------------|-----------------|-------------------------------|-----------------|
|                                                                 | O <sub>2</sub> | HO <sub>2</sub> | H <sub>2</sub> O <sub>2</sub> | OH <sup>a</sup> | O <sub>2</sub> | HO <sub>2</sub> | H <sub>2</sub> O <sub>2</sub> | OH <sup>a</sup> |
| H <sub>6</sub> PV <sub>2</sub> Mo <sub>10</sub> O <sub>40</sub> |                |                 |                               |                 |                |                 |                               |                 |
| PT                                                              | 167.2          | 117.3           | 121.7                         | 129.0           | 69.6           | 28.2            | 31.7                          | 28.7            |
| ET                                                              | 165.7          | 233.5           | 149.8                         | 135.7           | 45.6           | 130.3           | 41.7                          | 4.6             |
| CPET                                                            | 20.1           | -11.4           | -10.2 <sup>a</sup>            | -45.1           | 16.9           | -10.3           | -12.2 <sup>a</sup>            | -44.8           |
| H <sub>7</sub> PV <sub>2</sub> Mo <sub>10</sub> O <sub>40</sub> |                |                 |                               |                 |                |                 |                               |                 |
| PT                                                              | 171.6          | 121.7           | 126.1                         | 133.4           | 72.2           | 30.8            | 34.3                          | 31.3            |
| ET                                                              | 162.7          | 230.5           | 146.8                         | 132.7           | 42.5           | 127.2           | 38.6                          | 1.5             |
| CPET                                                            | 17             | -14.5           | -13.3 <sup>a</sup>            | -48.2           | 13.4           | -13.8           | -15.7 <sup>a</sup>            | -48.3           |

<sup>a</sup> H<sub>3</sub>O<sub>2</sub> dissociates to H<sub>2</sub>O and OH.

**Table S3.** Calculated stability of Mo-O-V and V-O-V reactive sites in acetonitrile at 298 K with respect to the corresponding intact Keggin structures. See Figure S9 for some typical defect structures with H<sub>2</sub>O.

|                                | H <sub>5</sub> PV <sub>2</sub> Mo <sub>10</sub> O <sub>40</sub> | [H <sub>5</sub> PV <sub>2</sub> Mo <sub>10</sub> O <sub>40</sub> ] <sup>1-</sup> | H <sub>6</sub> PV <sub>2</sub> Mo <sub>10</sub> O <sub>40</sub> | [H <sub>6</sub> PV <sub>2</sub> Mo <sub>10</sub> O <sub>40</sub> ] <sup>1-</sup> | H <sub>7</sub> PV <sub>2</sub> Mo <sub>10</sub> O <sub>40</sub> |
|--------------------------------|-----------------------------------------------------------------|----------------------------------------------------------------------------------|-----------------------------------------------------------------|----------------------------------------------------------------------------------|-----------------------------------------------------------------|
| V CUS (1,2)                    | 20.54                                                           | 19.58                                                                            | 22.28                                                           | 17.64                                                                            | 18.64                                                           |
| Mo CUS (1,2)                   | 16.50                                                           | 17.85                                                                            | 16.93                                                           | 13.75                                                                            | 15.32                                                           |
| Mo CUS (1,11)                  | 16.25                                                           | 14.10                                                                            | 14.35                                                           | 15.08                                                                            | 15.54                                                           |
| V CUS (1,2)-H <sub>2</sub> O   | 8.75                                                            | 8.24                                                                             | 11.20                                                           | 9.54                                                                             | 19.52                                                           |
| Mo CUS (1,2)-H <sub>2</sub> O  | 7.59                                                            | 9.73                                                                             | 7.42                                                            | 5.01                                                                             | 14.27                                                           |
| Mo CUS (1,11)-H <sub>2</sub> O | 8.62                                                            | 6.96                                                                             | 6.85                                                            | 8.03                                                                             | 13.22                                                           |

**Table S4.** Typical O<sub>2</sub> coordination modes to polyoxometalates isomers and their characteristics:  $\Delta G_{298}$ , kcal/mol with respect to the intact polyoxometalate (defect structure), O-O and M-O bond distances (d, Å), O-O bond stretching vibrational frequency ( $\nu_{\text{O-O}}$ , cm<sup>-1</sup>) and Atomic Polar Tensor (APT) charges on oxygen atoms.

|                                                                                                                                  |                    |  | H <sub>5</sub> PV <sub>2</sub> Mo <sub>10</sub> O <sub>40</sub> <sup>-</sup> | H <sub>6</sub> PV <sub>2</sub> Mo <sub>10</sub> O <sub>40</sub> | H <sub>6</sub> PV <sub>2</sub> Mo <sub>10</sub> O <sub>40</sub> <sup>-</sup> | H <sub>7</sub> PV <sub>2</sub> Mo <sub>10</sub> O <sub>40</sub> |
|----------------------------------------------------------------------------------------------------------------------------------|--------------------|--|------------------------------------------------------------------------------|-----------------------------------------------------------------|------------------------------------------------------------------------------|-----------------------------------------------------------------|
| 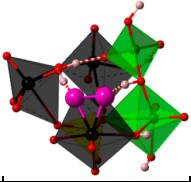<br>η <sup>2</sup> -Mo-O <sub>2</sub>           | $\Delta G_{298}$   |  | 21.1 (3.3)                                                                   | 22.7 (5.8)                                                      | 2.1 (-11.7)                                                                  | <b>7.3 (-8.0)</b>                                               |
|                                                                                                                                  | d <sub>O-O</sub>   |  | 1.312                                                                        | 1.311                                                           | 1.442                                                                        | 1.440                                                           |
|                                                                                                                                  | $\nu_{\text{O-O}}$ |  | 1180.3                                                                       | 1195.0                                                          | 925.5                                                                        | 928.8                                                           |
|                                                                                                                                  | d <sub>Mo-O</sub>  |  | 2.148; 2.182                                                                 | 2.207; 2.189                                                    | 1.986; 2.006                                                                 | 1.986; 2.011                                                    |
|                                                                                                                                  | O-APT ch.          |  | -0.217; -0.089                                                               | -0.207; -0.175                                                  | -0.366; -0.445                                                               | -0.349; -0.454                                                  |
| 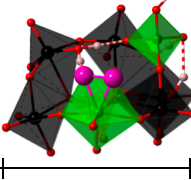<br>η <sup>2</sup> -V-O <sub>2</sub>            | $\Delta G_{298}$   |  | 15.9 (-3.7)                                                                  | 17.4 (-4.9)                                                     | 4.4 (-13.2)                                                                  | 11.7 (-6.9)                                                     |
|                                                                                                                                  | d <sub>O-O</sub>   |  | 1.304                                                                        | 1.302                                                           | 1.428                                                                        | 1.423                                                           |
|                                                                                                                                  | $\nu_{\text{O-O}}$ |  | 1203.1                                                                       | 1212.0                                                          | 951.1                                                                        | 954.2                                                           |
|                                                                                                                                  | d <sub>V-O</sub>   |  | 2.024; 2.018                                                                 | 2.017; 2.014                                                    | 1.903; 1.927                                                                 | 1.917; 1.851                                                    |
|                                                                                                                                  | O-APT ch.          |  | -0.180; -0.056                                                               | -0.152; -0.067                                                  | -0.325; -0.439                                                               | -0.259; -0.270                                                  |
| 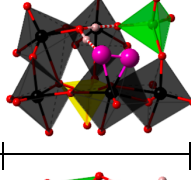<br>η <sup>2</sup> -Mo-O <sub>2</sub><br>(1,11) | $\Delta G_{298}$   |  | 17.8 (3.7)                                                                   | 20.0 (5.7)                                                      | 2.0 (-13.0)                                                                  | 5.0 (-10.5)                                                     |
|                                                                                                                                  | d <sub>O-O</sub>   |  | 1.312                                                                        | 1.307                                                           | 1.445                                                                        | 1.443                                                           |
|                                                                                                                                  | $\nu_{\text{O-O}}$ |  | 1184.0                                                                       | 1191.0                                                          | 929.6                                                                        | 950.7                                                           |
|                                                                                                                                  | d <sub>Mo-O</sub>  |  | 2.148; 2.195                                                                 | 2.120; 2.201                                                    | 1.972; 1.952                                                                 | 1.974; 1.948                                                    |
|                                                                                                                                  | O-APT ch.          |  | -0.206; -0.119                                                               | -0.177; -0.108                                                  | -0.358; -0.277                                                               | -0.344; -0.266                                                  |
| 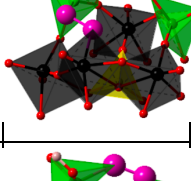<br>Mo-OO-V                                    | $\Delta G_{298}$   |  | 34.9                                                                         | 39.5                                                            | 20.6                                                                         | 24.2                                                            |
|                                                                                                                                  | d <sub>O-O</sub>   |  | 1.327                                                                        | 1.328                                                           | 1.450                                                                        | 1.436                                                           |
|                                                                                                                                  | $\nu_{\text{O-O}}$ |  | 1106.6                                                                       | 1105.1                                                          | 822.9                                                                        | 849.0                                                           |
|                                                                                                                                  | d <sub>Mo-O</sub>  |  | 2.219; 2.054                                                                 | 2.189; 2.045                                                    | 1.995; 1.846                                                                 | 2.011; 1.828                                                    |
|                                                                                                                                  | O-APT ch.          |  | -0.166; -0.241                                                               | -0.149; -0.253                                                  | -0.390; -0.416                                                               | -0.339; -0.417                                                  |
| 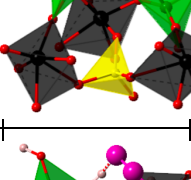<br>V-OO-V                                    | $\Delta G_{298}$   |  | 39.5                                                                         | 41.8                                                            | 30.6                                                                         | 26.4                                                            |
|                                                                                                                                  | d <sub>O-O</sub>   |  | 1.297                                                                        | 1.295                                                           | 1.358                                                                        | 1.385                                                           |
|                                                                                                                                  | $\nu_{\text{O-O}}$ |  | 1200.8                                                                       | 1203.1                                                          | 869.4                                                                        | 954.8                                                           |
|                                                                                                                                  | d <sub>V-O</sub>   |  | 1.992; 2.403                                                                 | 1.986; 2.416                                                    | 1.871; 1.858                                                                 | 1.842; 1.870                                                    |
|                                                                                                                                  | O-APT ch.          |  | -0.099; -0.291                                                               | -0.083; -0.279                                                  | -0.341; -0.360                                                               | -0.423; -0.316                                                  |
| 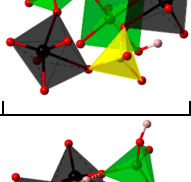<br>Mo-OO                                     | $\Delta G_{298}$   |  | 22.6                                                                         | 27.5                                                            | 20.5                                                                         | 22.8                                                            |
|                                                                                                                                  | d <sub>O-O</sub>   |  | 1.321                                                                        | 1.320                                                           | 1.323                                                                        | 1.321                                                           |
|                                                                                                                                  | $\nu_{\text{O-O}}$ |  | 1152.9                                                                       | 1154.5                                                          | 1127.8                                                                       | 1150.4                                                          |
|                                                                                                                                  | d <sub>Mo-O</sub>  |  | 2.205                                                                        | 2.196                                                           | 2.201                                                                        | 2.206                                                           |
|                                                                                                                                  | O-APT ch.          |  | -0.142; -0.357                                                               | -0.128; -0.347                                                  | -0.055; -0.348                                                               | -0.116; -0.339                                                  |
| 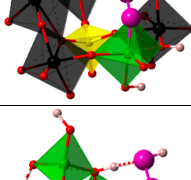<br>V-OO                                      | $\Delta G_{298}$   |  | 21.2                                                                         | 26.4                                                            | Not found                                                                    | Not found                                                       |
|                                                                                                                                  | d <sub>O-O</sub>   |  | 1.288                                                                        | 1.273                                                           |                                                                              |                                                                 |
|                                                                                                                                  | $\nu_{\text{O-O}}$ |  | 1258.1                                                                       | 1263.8                                                          |                                                                              |                                                                 |
|                                                                                                                                  | d <sub>V-O</sub>   |  | 1.972                                                                        | 1.943                                                           |                                                                              |                                                                 |
|                                                                                                                                  | O-APT ch.          |  | 0.313; -0.482                                                                | -0.016; -0.232                                                  |                                                                              |                                                                 |
| 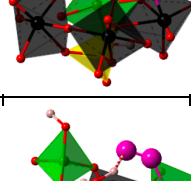<br>Mo-OOH                                    | $\Delta G_{298}$   |  | 25.1                                                                         | 26.8                                                            | 6.6                                                                          | 13.9                                                            |
|                                                                                                                                  | d <sub>O-O</sub>   |  | 1.334                                                                        | 1.333                                                           | 1.437                                                                        | 1.450                                                           |
|                                                                                                                                  | $\nu_{\text{O-O}}$ |  | 1133.5                                                                       | 1135.7                                                          | 899.7                                                                        | 888.2                                                           |
|                                                                                                                                  | d <sub>Mo-O</sub>  |  | 2.315                                                                        | 2.311                                                           | 1.983                                                                        | 1.985                                                           |
|                                                                                                                                  | O-APT ch.          |  | -0.014; -0.406                                                               | -0.025; -0.368                                                  | -0.209; -0.482                                                               | -0.353; -0.323                                                  |
| 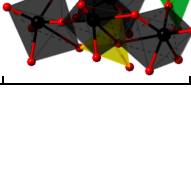<br>V-OOH                                     | $\Delta G_{298}$   |  | 29.5                                                                         | Not found                                                       | 15.0                                                                         | 25.5                                                            |
|                                                                                                                                  | d <sub>O-O</sub>   |  | 1.335                                                                        |                                                                 | 1.382                                                                        | 1.378                                                           |
|                                                                                                                                  | $\nu_{\text{O-O}}$ |  | 1113.8                                                                       |                                                                 | 1001.4                                                                       | 1017.3                                                          |
|                                                                                                                                  | d <sub>V-O</sub>   |  | 2.087                                                                        |                                                                 | 1.811                                                                        | 1.813                                                           |
|                                                                                                                                  | O-APT ch.          |  | 0.117; -0.454                                                                |                                                                 | -0.145; -0.298                                                               | -0.096; -0.278                                                  |

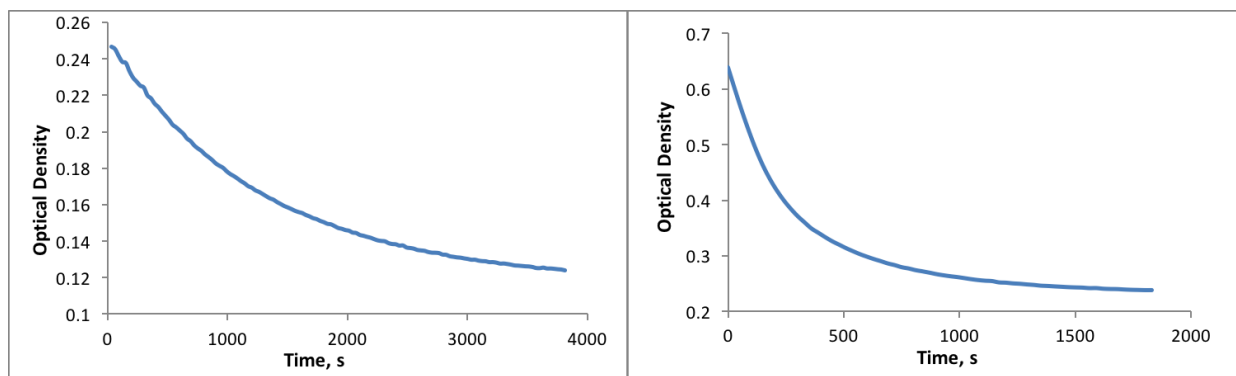

**Figure S1.** Exemplary kinetic profiles for the oxidation of 0.25 mM  $\mathbf{1}_{red1e}$  (left) and 0.27 mM  $\mathbf{1}_{red2e}$  (right) after reduction with  $H_2$  followed decrease of absorbance at 750 nm.  $[\mathbf{1}_{red1e}] = 0.25$  mM, in acetonitrile saturated with air at 25 °C.

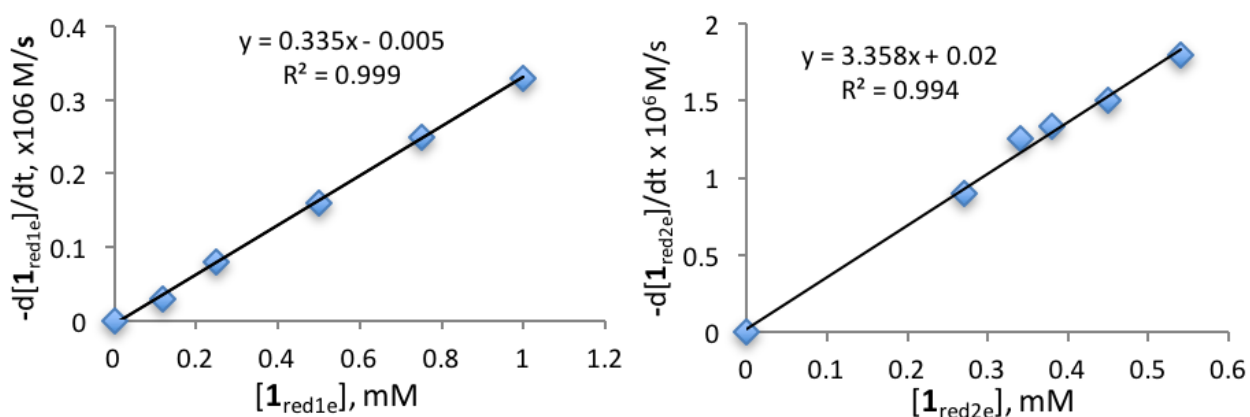

**Figure S2.** Dependence of initial rate ( $-d[\mathbf{1}_{red}]_0/dt$ ) of the oxidation of  $\mathbf{1}_{red1e}$  (left) and  $\mathbf{1}_{red2e}$  (right) in acetonitrile at the initial  $O_2$  concentration of 2.4 mM at 25 °C.

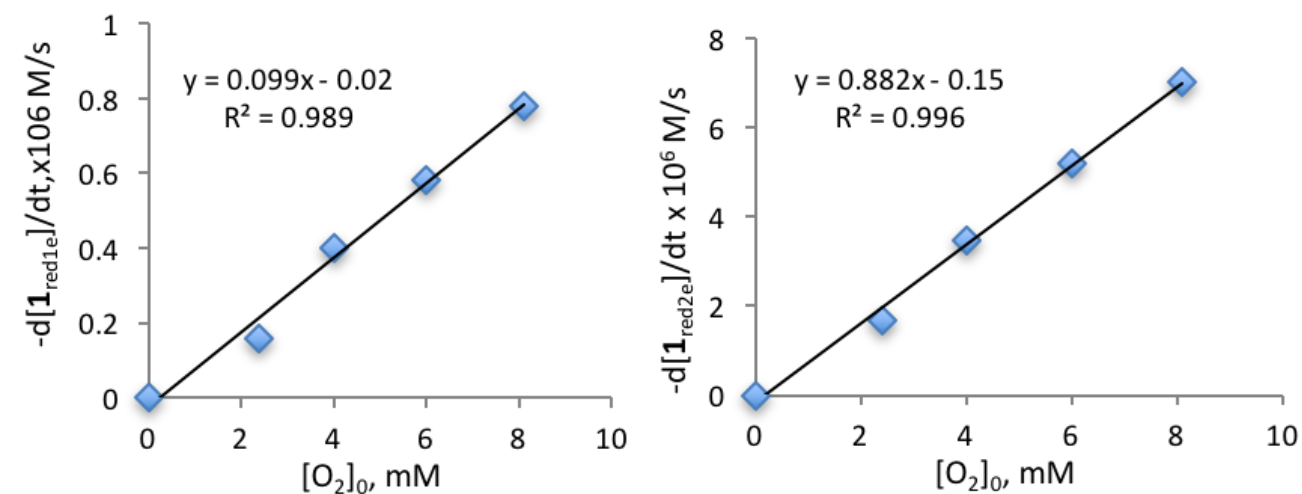

**Figure S3.** Dependence of the initial rate ( $-d[\mathbf{1}_{red1e}]_0/dt$ ) of the oxidation of  $\mathbf{1}_{red1e}$  (0.5 mM) (left) and dependence of the initial rate ( $-d[\mathbf{1}_{red2e}]_0/dt$ ) of the oxidation of  $\mathbf{1}_{red2e}$  (0.5 mM) (right) in acetonitrile on the initial concentration of  $O_2$   $[O_2]_0$  at 25 °C.

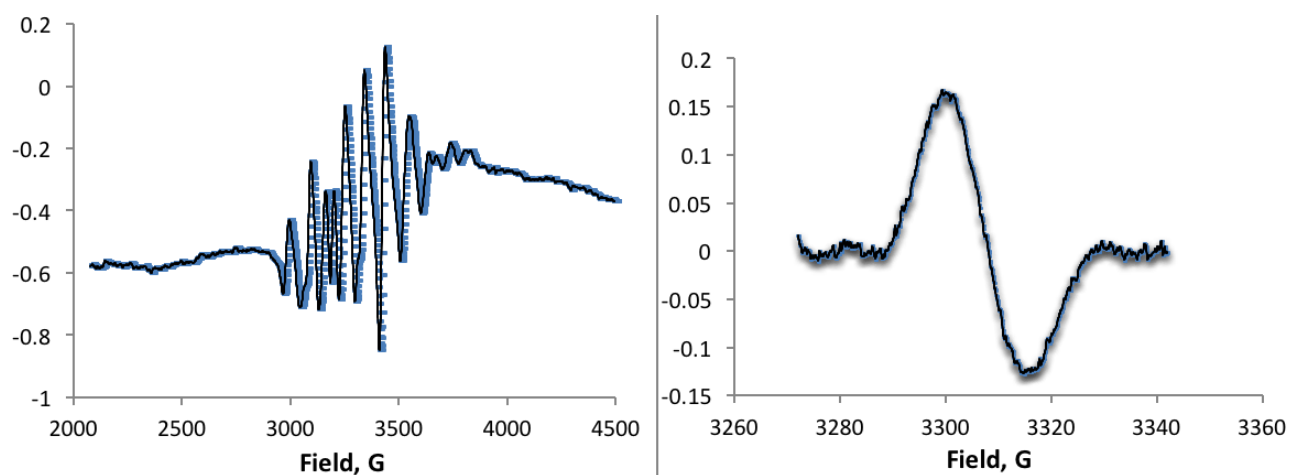

**Figure S4.** EPR Spectra. Left – 1 mM  $\text{H}_5\text{PV}_2\text{Mo}_{10}\text{O}_{40}$  + 1 mM  $\text{Ph}_3\text{P}$  in acetonitrile at 25°C under Ar showing the contribution of V(IV) and  $\text{Ph}_3\text{P}^{\bullet+}$ . Right-  $g = 2.008$  signal (zoom in) on the peak associable to  $\text{Ph}_3\text{P}^{\bullet+}$ .

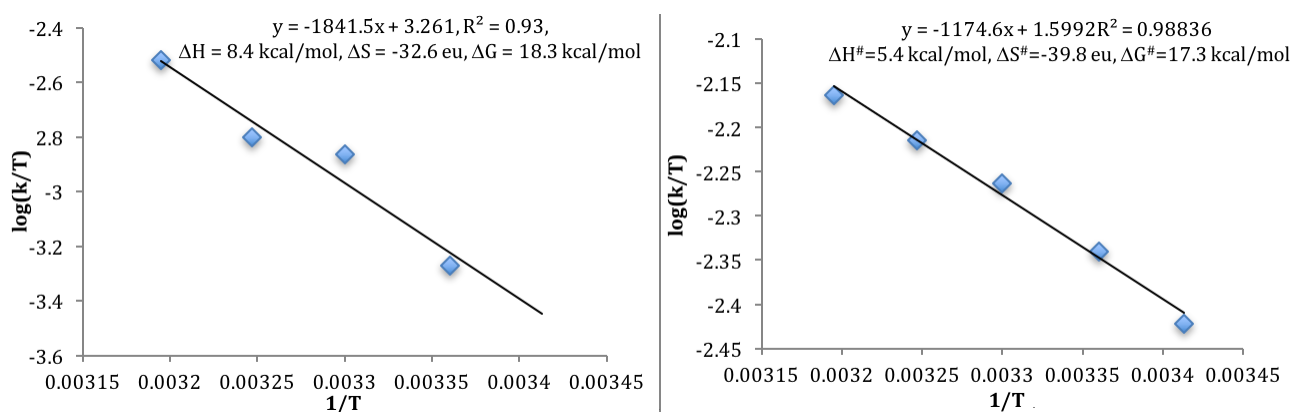

**Figure S5.** Eyring plot of reoxidation of  $1_{\text{red1e}}$  (left) and  $1_{\text{red2e}}$  (right) after reduction with  $\text{H}_2$ ,  $[\text{1}] = 0.5$  mM under air, in acetonitrile.

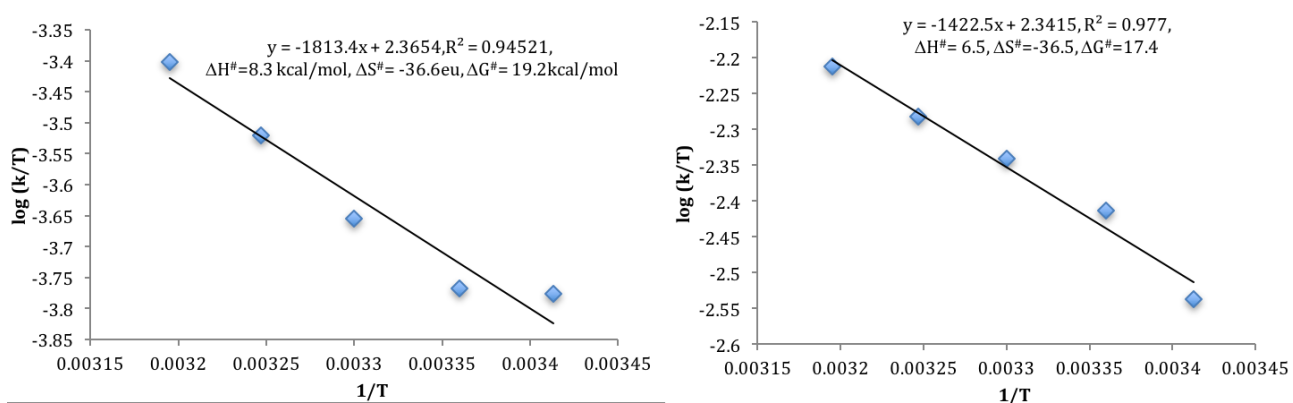

**Figure S6.** Eyring plot of reoxidation of  $1_{\text{red1e}}$  (left) and  $1_{\text{red2e}}$  (right) after reaction with  $\text{Ph}_3\text{P}$  at 70°C for 2 hours.  $[\text{1}] = 0.5$  mM,  $[\text{Ph}_3\text{P}] = 0.25$  mM or 0.50 mM under air in acetonitrile.

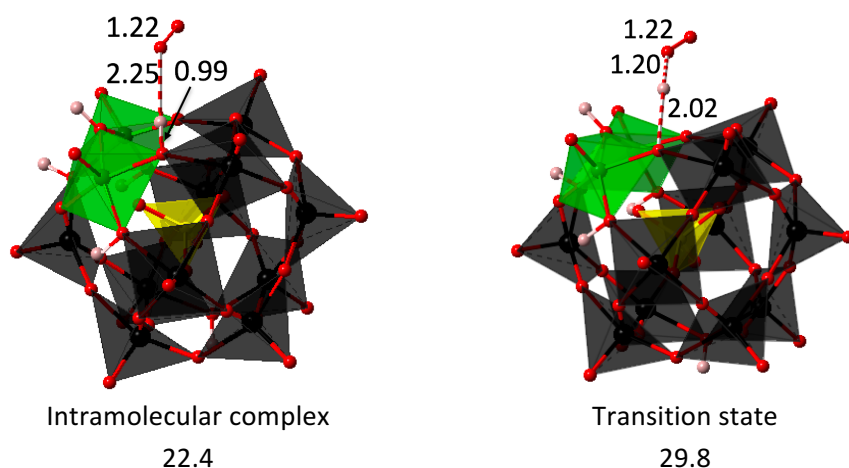

**Figure S7.** – Optimized structures of outer-sphere complexes  $\text{H}_6\text{PV}_2\text{Mo}_{10}\text{O}_{40}\text{-O}_2$  and their calculated energies ( $\Delta G_{298}$ , kcal/mol) in acetonitrile

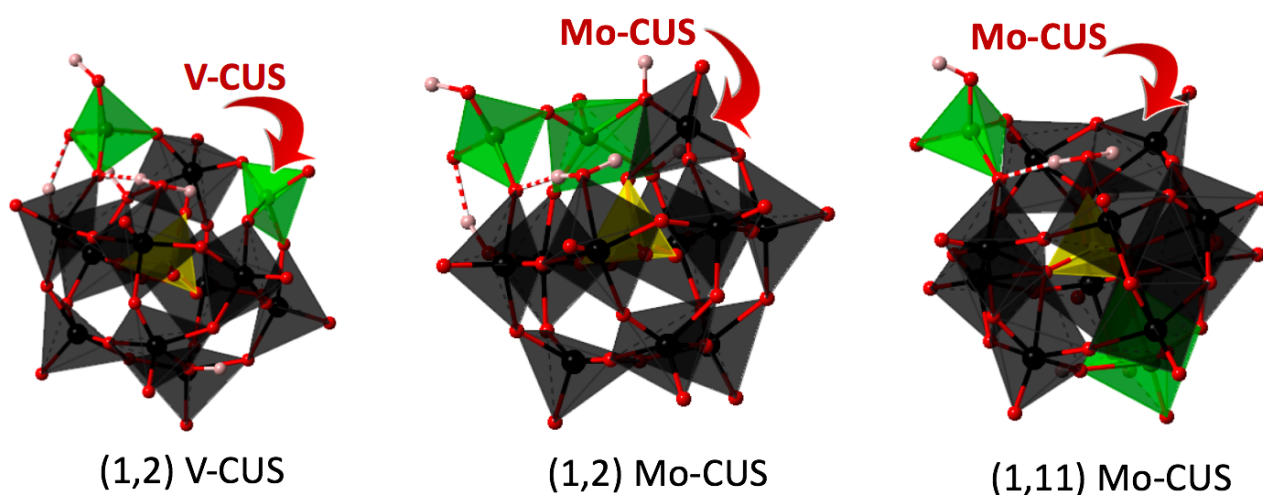

**Figure S8.** – Optimized structures of CUS species in Table 3

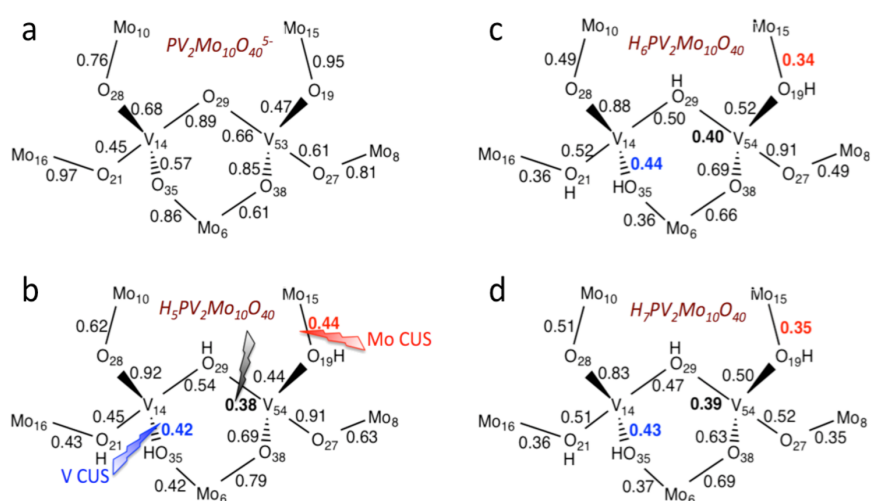

**Figure S9.** Wiberg bond indices for selected V-O and Mo-O bonds in (1,2) isomer of polyoxoanion  $\text{PV}_2\text{Mo}_{10}\text{O}_{40}^{5-}$  (a), its protonated form  $\text{H}_5\text{PV}_2\text{Mo}_{10}\text{O}_{40}$  (b) and in 1e- and 2e-reduced polyoxometalates  $\text{H}_6\text{PV}_2\text{Mo}_{10}\text{O}_{40}$  (c) and  $\text{H}_7\text{PV}_2\text{Mo}_{10}\text{O}_{40}$  (d).

Further explanation: Explicit consideration of protons is critically important for understanding of defect formation (a and b). One of the V-O-bonds,  $V_{53}-O_{29}$ , represents the weakest bridging bond in the  $H_5PV_2Mo_{10}O_{40}$  (1,2) isomer. Breaking of this bond together with one of the other weak bonds,  $Mo_{15}-O_{19}$  or  $V_{14}-O_{35}$ , leads to Mo or V CUS, respectively. Decreased stabilization of the surrounding framework permits breaking of the bond connecting the  $V_{14}$  CUS atom with the central  $PO_4$  tetrahedron and further destabilization of the Keggin structure: the  $V_{14}-O_i$  bond length in this structure is 2.54 Å, compared to 2.15 Å for the  $Mo_{15}-O_i$  distance in the structure with a Mo CUS, while the corresponding Wiberg bond orders are 0.14 and 0.30, respectively. That makes the V CUS species 4 kcal/mol higher in energy than its Mo CUS counterpart. Reduction of phosphovanadomolibdates strongly destabilizes Mo-O bonds making Mo CUS formation preferential, both kinetically and thermodynamically (c, d). Very similar results were found for the (1,11) isomer.

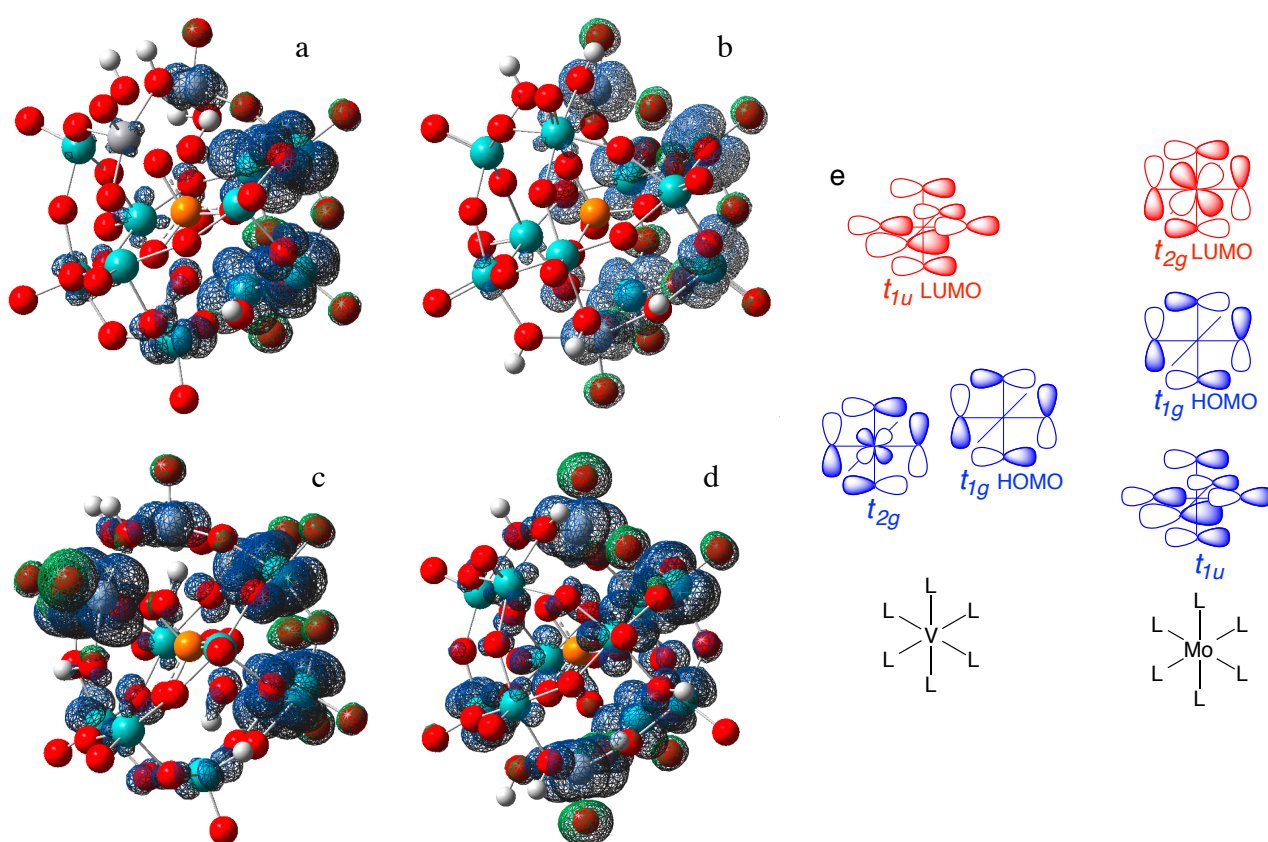

**Figure S10.** Spin density distribution in the (1,2) (a,c) and (1,11) (b,d) isomers of **1<sub>red1e</sub>** (a,b) and **1<sub>red2e</sub>** (c,d). Qualitative representation of the boundary orbitals of  $V^{5+}$  and  $Mo^{6+}$  in the octahedral crystal field of strong  $\sigma$  and  $\pi$  donor ligands and their relative energies (e).

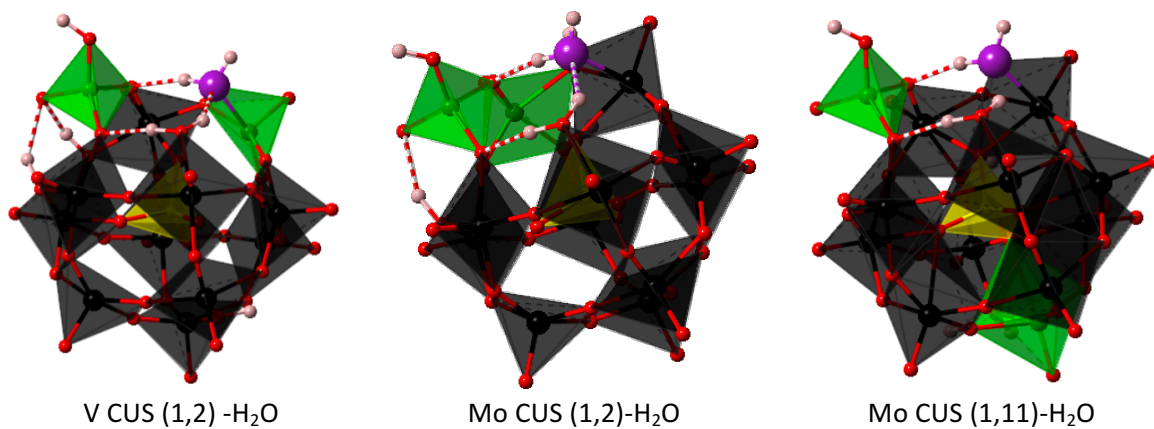

**Figure S11.** Typical defect structures with CUS on V and on Mo atoms in presence of water. Large purple spheres distinguish O-atom of coordinated water.

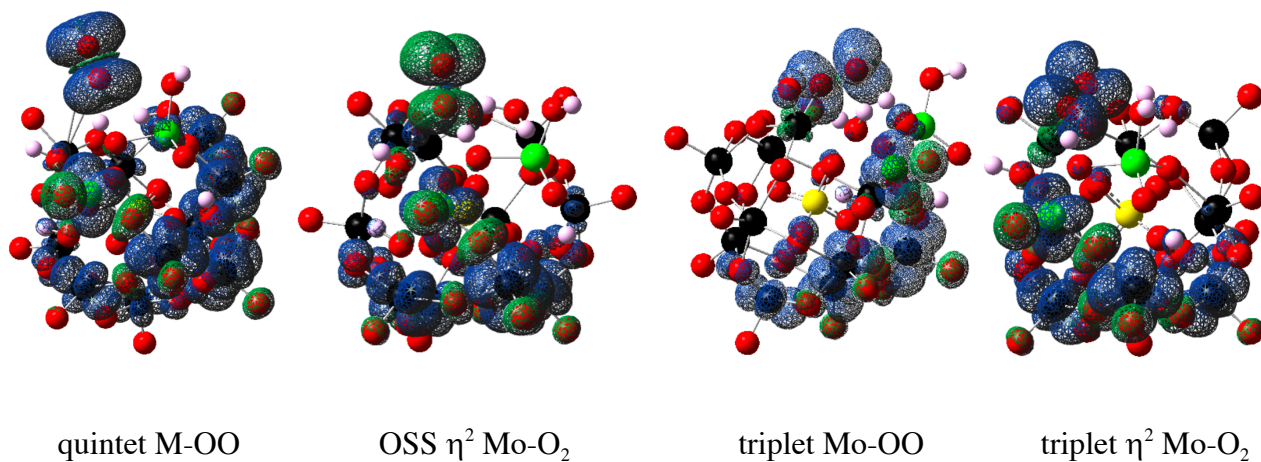

**Figure S12.** Spin density distribution in **1<sub>red2e</sub>**-O<sub>2</sub> complexes in different multiplicity states.
